# Supplementary material for: Centenarians Today: New Insights on Selection from the 5-COOP Study
Source: Hindawi journal article supplement (doi:10.1155/2010/120354), 2010-01-01
Supplement: f1 [file 120354.f1.pdf]

**Figure A1: Increase in the number of centenarians (100 and 100+) since 1946\*, by sex – the 5-COOP study**

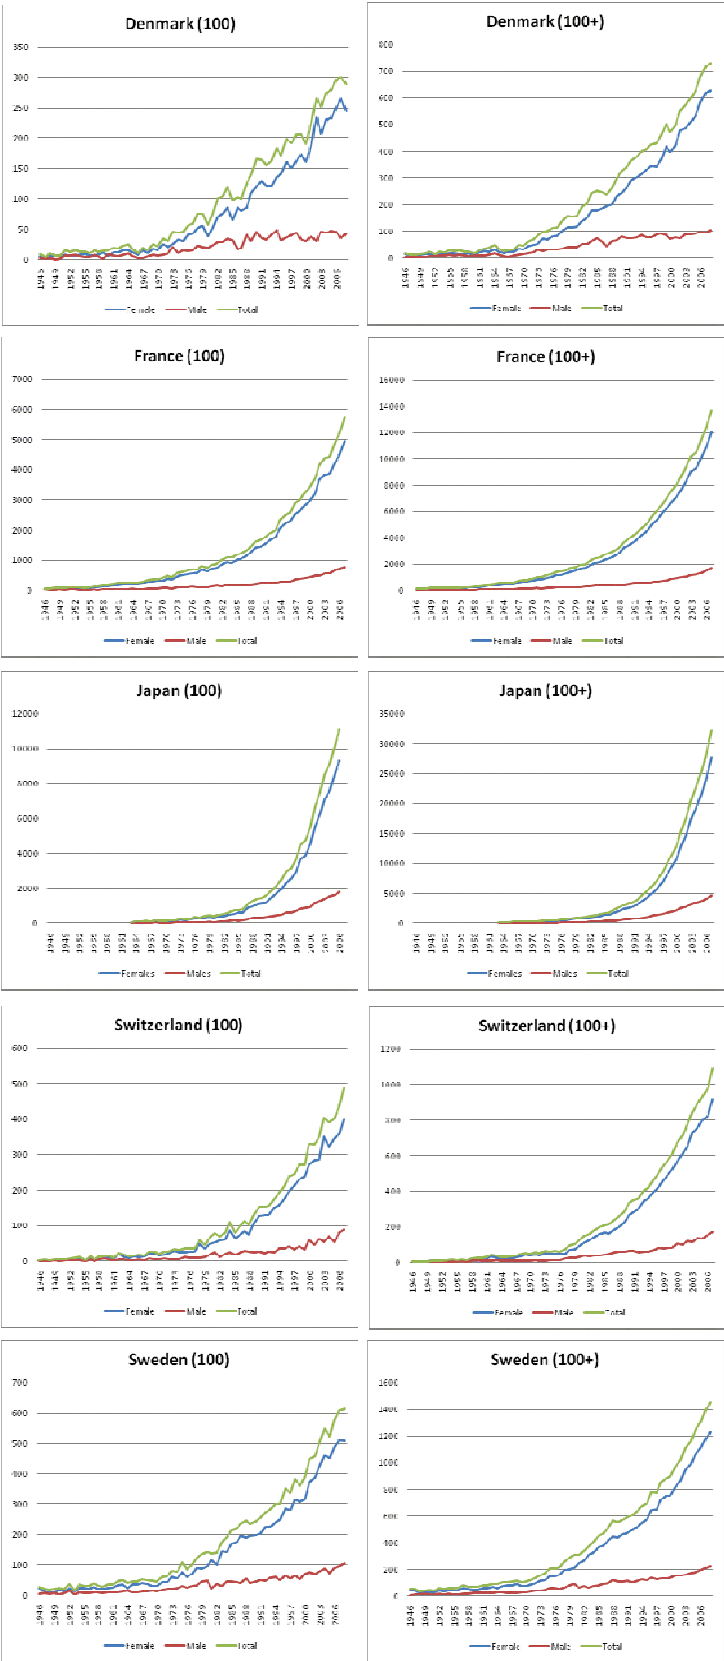

\*Since 1963 in Japan - Source of data: Human Mortality Database (HMD) and *Zenkoku koureisha meibo* (for Japan)
