# Supplementary material for: Centenarians Today: New Insights on Selection from the 5-COOP Study
Source: Hindawi journal article supplement (doi:10.1155/2010/120354), 2010-01-01
Supplement: f2 [file 120354.f2.pdf]

**Table A1: Countries having experienced the lowest and the highest age mortality levels through the age mortality trajectory above the age of 50 years, by sex and cohort – the 5-COOP study**

| Age | Females      |             |              |             | Males        |             |              |         |
|-----|--------------|-------------|--------------|-------------|--------------|-------------|--------------|---------|
|     | Cohorts 1905 |             | Cohorts 1910 |             | Cohorts 1905 |             | Cohorts 1910 |         |
|     | Min          | Max         | Min          | Max         | Min          | Max         | Min          | Max     |
| 50  | Switzerland  | Japan       | Switzerland  | Japan       | Sweden       | France      | Sweden       | France  |
| 51  | Sweden       | Japan       | Sweden       | Japan       | Denmark      | France      | Sweden       | France  |
| 52  | Sweden       | Japan       | Sweden       | Japan       | Sweden       | France      | Sweden       | France  |
| 53  | Sweden       | Japan       | Sweden       | Japan       | Sweden       | France      | Sweden       | France  |
| 54  | Sweden       | Japan       | Sweden       | Japan       | Sweden       | France      | Sweden       | France  |
| 55  | Sweden       | Japan       | Sweden       | Japan       | Sweden       | Japan       | Sweden       | France  |
| 56  | Sweden       | Japan       | Sweden       | Denmark     | Sweden       | France      | Sweden       | France  |
| 57  | Sweden       | Japan       | Sweden       | Japan       | Sweden       | France      | Sweden       | France  |
| 58  | Sweden       | Japan       | Switzerland  | Japan       | Sweden       | France      | Sweden       | France  |
| 59  | Sweden       | Japan       | Sweden       | Japan       | Sweden       | France      | Sweden       | France  |
| 60  | Sweden       | Japan       | Sweden       | Denmark     | Sweden       | France      | Sweden       | France  |
| 61  | Sweden       | Japan       | Sweden       | Japan       | Sweden       | France      | Sweden       | France  |
| 62  | Sweden       | Japan       | Sweden       | Denmark     | Sweden       | France      | Sweden       | France  |
| 63  | Sweden       | Japan       | France       | Denmark     | Sweden       | France      | Sweden       | France  |
| 64  | Sweden       | Japan       | Switzerland  | Japan       | Sweden       | France      | Sweden       | France  |
| 65  | Sweden       | Japan       | Switzerland  | Denmark     | Sweden       | France      | Japan        | France  |
| 66  | Sweden       | Japan       | Switzerland  | Denmark     | Sweden       | France      | Japan        | Denmark |
| 67  | Switzerland  | Denmark     | Switzerland  | Denmark     | Sweden       | France      | Japan        | France  |
| 68  | Switzerland  | Japan       | Switzerland  | Denmark     | Sweden       | France      | Japan        | Denmark |
| 69  | Switzerland  | Japan       | Switzerland  | Denmark     | Japan        | France      | Japan        | Denmark |
| 70  | Switzerland  | Denmark     | Switzerland  | Denmark     | Japan        | France      | Japan        | Denmark |
| 71  | Switzerland  | Denmark     | Switzerland  | Denmark     | Japan        | Denmark     | Japan        | Denmark |
| 72  | France       | Denmark     | Switzerland  | Denmark     | Japan        | Denmark     | Japan        | Denmark |
| 73  | Switzerland  | Denmark     | France       | Denmark     | Japan        | Denmark     | Japan        | Denmark |
| 74  | Switzerland  | Denmark     | Japan        | Denmark     | Japan        | Denmark     | Japan        | Denmark |
| 75  | Switzerland  | Japan       | Japan        | Denmark     | Switzerland  | Denmark     | Japan        | Denmark |
| 76  | Switzerland  | Sweden      | Japan        | Denmark     | Switzerland  | Denmark     | Japan        | Denmark |
| 77  | Sweden       | Denmark     | Japan        | Denmark     | Japan        | Denmark     | Japan        | Denmark |
| 78  | Switzerland  | Denmark     | Japan        | Denmark     | Japan        | Denmark     | Japan        | Denmark |
| 79  | Switzerland  | Denmark     | Japan        | Denmark     | Japan        | Denmark     | Japan        | Denmark |
| 80  | Japan        | Denmark     | France       | Denmark     | Japan        | Denmark     | Japan        | Denmark |
| 81  | Switzerland  | Sweden      | France       | Denmark     | Japan        | Denmark     | Japan        | Denmark |
| 82  | France       | Denmark     | France       | Denmark     | Switzerland  | Denmark     | France       | Denmark |
| 83  | Switzerland  | Denmark     | Japan        | Denmark     | Japan        | Denmark     | Japan        | Denmark |
| 84  | Japan        | Denmark     | France       | Denmark     | Japan        | Denmark     | France       | Denmark |
| 85  | France       | Denmark     | Japan        | Denmark     | France       | Sweden      | Japan        | Denmark |
| 86  | France       | Denmark     | Japan        | Denmark     | France       | Denmark     | Japan        | Denmark |
| 87  | France       | Denmark     | Japan        | Denmark     | Switzerland  | Denmark     | Japan        | Sweden  |
| 88  | Japan        | Denmark     | Japan        | Denmark     | Japan        | Denmark     | Japan        | Denmark |
| 89  | France       | Switzerland | Japan        | Switzerland | France       | Denmark     | Japan        | Denmark |
| 90  | Japan        | Denmark     | Japan        | Denmark     | Japan        | Denmark     | Japan        | Denmark |
| 91  | Japan        | Denmark     | Japan        | Sweden      | Japan        | Denmark     | Japan        | Sweden  |
| 92  | Japan        | Denmark     | Japan        | Sweden      | Japan        | Denmark     | Japan        | Denmark |
| 93  | Japan        | Sweden      | Japan        | Denmark     | Japan        | Switzerland | Japan        | Sweden  |
| 94  | Japan        | Switzerland | Japan        | Sweden      | Japan        | Denmark     | Japan        | Sweden  |
| 95  | Japan        | Sweden      | Japan        | Sweden      | Japan        | Sweden      | Japan        | Denmark |
| 96  | Japan        | Sweden      | :            | :           | Japan        | Sweden      | :            | :       |
| 97  | Japan        | Sweden      | :            | :           | Japan        | Switzerland | :            | :       |
| 98  | Japan        | Denmark     | :            | :           | Denmark      | Sweden      | :            | :       |
| 99  | Japan        | Switzerland | :            | :           | Switzerland  | Denmark     | :            | :       |
| 100 | Japan        | Denmark     | :            | :           | Sweden       | Switzerland | :            | :       |
